# Supplementary material for: Aluminium 8-Hydroxyquinolinate N-Oxide as a Precursor to Heterometallic Aluminium–Lanthanide Complexes
Source: MDPI journal article supplement (doi:10.3390/molecules29020451), 2024-01-17

---

The following ALERTS were generated. Each ALERT has the format

**test-name\_ALERT\_alert-type\_alert-level.**

Click on the hyperlinks for more details of the test.

---

### Alert level B

PLAT234\_ALERT\_4\_B Large Hirshfeld Difference C44 --C45 . 0.26 Ang.  
PLAT910\_ALERT\_3\_B Missing # of FCF Reflection(s) Below Theta(Min). 13 Note  
0 1 0, 1 0 0, 1 1 0, 2 0 0, -2 1 1, -1 1 1,  
0 1 1, 1 1 1, -2 0 2, -1 0 2, -1 1 2, 0 0 2,  
1 0 2,

---

### Alert level C

PLAT042\_ALERT\_1\_C Calc. and Reported MoietyFormula Strings Differ Please Check  
Calc: 2(C42 H21 Al Eu F18 N3 O12), C7 H8  
Rep.: C42 H21 Al Eu F18 N3 O12, 0.5(C7 H8)

PLAT213\_ALERT\_2\_C Atom F4 has ADP max/min Ratio ..... 3.3 prolat  
PLAT220\_ALERT\_2\_C NonSolvent Resd 1 C Ueq(max)/Ueq(min) Range 3.9 Ratio  
PLAT230\_ALERT\_2\_C Hirshfeld Test Diff for F18 --C42 . 5.3 s.u.  
PLAT230\_ALERT\_2\_C Hirshfeld Test Diff for O10 --C36 . 5.3 s.u.  
PLAT230\_ALERT\_2\_C Hirshfeld Test Diff for O12 --C41 . 5.4 s.u.  
PLAT234\_ALERT\_4\_C Large Hirshfeld Difference F4 --C32 . 0.19 Ang.  
PLAT234\_ALERT\_4\_C Large Hirshfeld Difference F6 --C32 . 0.18 Ang.  
PLAT234\_ALERT\_4\_C Large Hirshfeld Difference F7A --C33 . 0.22 Ang.  
PLAT234\_ALERT\_4\_C Large Hirshfeld Difference F8A --C33 . 0.24 Ang.  
PLAT234\_ALERT\_4\_C Large Hirshfeld Difference F11 --C37 . 0.22 Ang.  
PLAT234\_ALERT\_4\_C Large Hirshfeld Difference F13 --C38 . 0.22 Ang.  
PLAT234\_ALERT\_4\_C Large Hirshfeld Difference F14 --C38 . 0.24 Ang.  
PLAT234\_ALERT\_4\_C Large Hirshfeld Difference F15 --C38 . 0.19 Ang.  
PLAT234\_ALERT\_4\_C Large Hirshfeld Difference F16 --C42 . 0.18 Ang.  
PLAT234\_ALERT\_4\_C Large Hirshfeld Difference O8 --C31 . 0.16 Ang.  
PLAT234\_ALERT\_4\_C Large Hirshfeld Difference O11 --C39 . 0.16 Ang.  
PLAT234\_ALERT\_4\_C Large Hirshfeld Difference N1 --C9 . 0.16 Ang.  
PLAT234\_ALERT\_4\_C Large Hirshfeld Difference C34 --C35 . 0.16 Ang.

PLAT241\_ALERT\_2\_C High 'MainMol' Ueq as Compared to Neighbors of O1 Check  
PLAT241\_ALERT\_2\_C High 'MainMol' Ueq as Compared to Neighbors of C2 Check  
PLAT241\_ALERT\_2\_C High 'MainMol' Ueq as Compared to Neighbors of C3 Check  
PLAT241\_ALERT\_2\_C High 'MainMol' Ueq as Compared to Neighbors of C5 Check  
PLAT241\_ALERT\_2\_C High 'MainMol' Ueq as Compared to Neighbors of C20 Check  
PLAT241\_ALERT\_2\_C High 'MainMol' Ueq as Compared to Neighbors of C21 Check  
PLAT241\_ALERT\_2\_C High 'MainMol' Ueq as Compared to Neighbors of C23 Check  
PLAT242\_ALERT\_2\_C Low 'MainMol' Ueq as Compared to Neighbors of Eu1 Check  
PLAT242\_ALERT\_2\_C Low 'MainMol' Ueq as Compared to Neighbors of C4 Check  
PLAT242\_ALERT\_2\_C Low 'MainMol' Ueq as Compared to Neighbors of C19 Check  
PLAT242\_ALERT\_2\_C Low 'MainMol' Ueq as Compared to Neighbors of C27 Check  
PLAT242\_ALERT\_2\_C Low 'MainMol' Ueq as Compared to Neighbors of C31 Check  
PLAT242\_ALERT\_2\_C Low 'MainMol' Ueq as Compared to Neighbors of C36 Check  
PLAT242\_ALERT\_2\_C Low 'MainMol' Ueq as Compared to Neighbors of C39 Check  
PLAT242\_ALERT\_2\_C Low 'MainMol' Ueq as Compared to Neighbors of C41 Check  
PLAT244\_ALERT\_4\_C Low 'Solvent' Ueq as Compared to Neighbors of C46 Check  
PLAT260\_ALERT\_2\_C Large Average Ueq of Residue Including Eu1 0.150 Check  
PLAT260\_ALERT\_2\_C Large Average Ueq of Residue Including C43 0.212 Check  
PLAT342\_ALERT\_3\_C Low Bond Precision on C-C Bonds ..... 0.01389 Ang.  
PLAT601\_ALERT\_2\_C Unit Cell Contains Solvent Accessible VOIDS of . 40 Ang\*\*3  
PLAT721\_ALERT\_1\_C Bond Calc 0.97000, Rep 0.99(4) Dev... 0.02 Ang.

|                   |                                                  |         |         |         |         |     |        |
|-------------------|--------------------------------------------------|---------|---------|---------|---------|-----|--------|
| C47               | -H47E                                            | 1_555   | 2_756   | .....   | #       | 132 | Check  |
| PLAT911_ALERT_3_C | Missing FCF Refl Between Thmin & STh/L=          | 0.600   |         |         |         | 44  | Report |
| 0                 | 3 0, 2 1 0,                                      | 2 2 0,  | 3 0 0,  | 4 0 0,  | 5 1 0,  |     |        |
| 6                 | 14 0, -5 1 1,                                    | -4 2 1, | -3 1 1, | -1 2 1, | 1 2 1,  |     |        |
| 3                 | 1 1, 3 2 1,                                      | 5 2 1,  | 5 14 1, | -5 0 2, | -3 0 2, |     |        |
| -2                | 1 2, -2 3 2,                                     | 1 1 2,  | 1 3 2,  | 2 0 2,  | 2 2 2,  |     |        |
| 3                 | 0 2, 4 2 2,                                      | -4 1 3, | -4 2 3, | -3 2 3, | -1 1 3, |     |        |
| 0                 | 1 3, 0 2 3,                                      | 1 1 3,  | 1 2 3,  | 2 2 3,  | 3 1 3,  |     |        |
| 4                 | 1 3, -3 0 4,                                     | -3 1 4, | 0 0 4,  | 2 0 4,  | -4 4 5, |     |        |
| -2                | 1 5, -1 0 6,                                     |         |         |         |         |     |        |
| PLAT913_ALERT_3_C | Missing # of Very Strong Reflections in FCF .... |         |         |         |         | 15  | Note   |
| 0                 | 3 0, 2 0 0,                                      | -4 2 1, | -1 1 1, | 1 1 1,  | -5 0 2, |     |        |
| 0                 | 0 2, 3 0 2,                                      | 4 2 2,  | -4 1 3, | -3 2 3, | 3 1 3,  |     |        |
| 0                 | 0 4, -4 4 5,                                     | -2 1 5, |         |         |         |     |        |

### Alert level G

FORMU01\_ALERT\_1\_G There is a discrepancy between the atom counts in the  
 \_chemical\_formula\_sum and \_chemical\_formula\_moiety. This is  
 usually due to the moiety formula being in the wrong format.  
 Atom count from \_chemical\_formula\_sum: C45.5 H25 Al1 Eu1 F18 N3 O12  
 Atom count from \_chemical\_formula\_moiety: C45.5 H25 Al1 Eu1 F18 N3O12

FORMU01\_ALERT\_2\_G There is a discrepancy between the atom counts in the  
 \_chemical\_formula\_sum and the formula from the \_atom\_site\* data.  
 Atom count from \_chemical\_formula\_sum: C45.5 H25 Al1 Eu1 F18 N3 O12  
 Atom count from the \_atom\_site data: C46.5 H25 Al1 Eu1 F18 N3 O12

CELLZ01\_ALERT\_1\_G Difference between formula and atom\_site contents detected.

CELLZ01\_ALERT\_1\_G ALERT: Large difference may be due to a  
 symmetry error - see SYMMG tests  
 From the CIF: \_cell\_formula\_units\_Z 4  
 From the CIF: \_chemical\_formula\_sum C45.50 H25 Al Eu F18 N3 O12  
 TEST: Compare cell contents of formula and atom\_site data

| atom | Z*formula | cif sites | diff  |
|------|-----------|-----------|-------|
| C    | 182.00    | 186.00    | -4.00 |
| H    | 100.00    | 100.00    | 0.00  |
| Al   | 4.00      | 4.00      | 0.00  |
| Eu   | 4.00      | 4.00      | 0.00  |
| F    | 72.00     | 72.00     | 0.00  |
| N    | 12.00     | 12.00     | 0.00  |
| O    | 48.00     | 48.00     | 0.00  |

PLAT002\_ALERT\_2\_G Number of Distance or Angle Restraints on AtSite 1 Note

PLAT003\_ALERT\_2\_G Number of Uiso or Uij Restrained non-H Atoms ... 10 Report

PLAT045\_ALERT\_1\_G Calculated and Reported Z Differ by a Factor ... 0.500 Check

PLAT083\_ALERT\_2\_G SHELXL Second Parameter in WGHT Unusually Large 6.98 Why ?

PLAT172\_ALERT\_4\_G The CIF-Embedded .res File Contains DFIX Records 1 Report

PLAT178\_ALERT\_4\_G The CIF-Embedded .res File Contains SIMU Records 3 Report

PLAT186\_ALERT\_4\_G The CIF-Embedded .res File Contains ISOR Records 1 Report

PLAT188\_ALERT\_3\_G A Non-default SIMU Restraint Value has been used 0.0100 Report

PLAT188\_ALERT\_3\_G A Non-default SIMU Restraint Value has been used 0.0100 Report

PLAT188\_ALERT\_3\_G A Non-default SIMU Restraint Value has been used 0.0200 Report

PLAT242\_ALERT\_2\_G Low 'MainMol' Ueq as Compared to Neighbors of C28 Check

PLAT242\_ALERT\_2\_G Low 'MainMol' Ueq as Compared to Neighbors of C32 Check

PLAT242\_ALERT\_2\_G Low 'MainMol' Ueq as Compared to Neighbors of C33 Check

PLAT242\_ALERT\_2\_G Low 'MainMol' Ueq as Compared to Neighbors of C37 Check

PLAT242\_ALERT\_2\_G Low 'MainMol' Ueq as Compared to Neighbors of C42 Check

PLAT300\_ALERT\_4\_G Atom Site Occupancy of H47A Constrained at 0.25 Check

PLAT300\_ALERT\_4\_G Atom Site Occupancy of H47B Constrained at 0.25 Check  
 PLAT300\_ALERT\_4\_G Atom Site Occupancy of H47C Constrained at 0.25 Check  
 PLAT300\_ALERT\_4\_G Atom Site Occupancy of H47D Constrained at 0.25 Check  
 PLAT300\_ALERT\_4\_G Atom Site Occupancy of H47E Constrained at 0.25 Check  
 PLAT300\_ALERT\_4\_G Atom Site Occupancy of H47F Constrained at 0.25 Check  
 PLAT301\_ALERT\_3\_G Main Residue Disorder .....(Resd 1) 4% Note  
 PLAT367\_ALERT\_2\_G Long? C(sp?)-C(sp?) Bond C46 - C47 . 1.51 Ang.  
 PLAT434\_ALERT\_2\_G Short Inter HL..HL Contact F13 ..F13 . 2.70 Ang.  
 1-x,y,1/2-z = 2\_655 Check  
 PLAT721\_ALERT\_1\_G Bond Calc 0.97000, Rep 0.96000 Dev... 0.01 Ang.  
 C47 -H47A 1\_555 1\_555 ..... # 124 Check  
 PLAT721\_ALERT\_1\_G Bond Calc 0.97000, Rep 0.96000 Dev... 0.01 Ang.  
 C47 -H47E 1\_555 1\_555 ..... # 128 Check  
 PLAT722\_ALERT\_1\_G Angle Calc 108.00, Rep 109.50 Dev... 1.50 Degree  
 H47A -C47 -H47C 1\_555 1\_555 1\_555 # 260 Check  
 PLAT722\_ALERT\_1\_G Angle Calc 111.00, Rep 109.50 Dev... 1.50 Degree  
 H47D -C47 -H47F 1\_555 1\_555 1\_555 # 263 Check  
 PLAT722\_ALERT\_1\_G Angle Calc 108.00, Rep 109.50 Dev... 1.50 Degree  
 H47E -C47 -H47F 1\_555 1\_555 1\_555 # 264 Check  
 PLAT860\_ALERT\_3\_G Number of Least-Squares Restraints ..... 43 Note  
 PLAT883\_ALERT\_1\_G No Info/Value for \_atom\_sites\_solution\_primary . Please Do !  
 PLAT899\_ALERT\_4\_G SHELXL2018 is Deprecated and Succeeded by SHELXL 2019/3 Note  
 PLAT912\_ALERT\_4\_G Missing # of FCF Reflections Above STh/L= 0.600 5 Note  
 PLAT933\_ALERT\_2\_G Number of HKL-OMIT Records in Embedded .res File 17 Note  
 2 0 0, 0 0 2, -1 1 1, 1 1 1, -3 0 2, -1 0 2,  
 0 1 3, 3 1 1, 4 0 0, 0 1 1, -2 0 2, -1 1 3,  
 -2 1 1, 1 0 0, 0 1 0, 1 1 0, -1 2 1,  
 PLAT941\_ALERT\_3\_G Average HKL Measurement Multiplicity ..... 4.8 Low  
 PLAT965\_ALERT\_2\_G The SHELXL WEIGHT Optimisation has not Converged Please Check  
 PLAT969\_ALERT\_5\_G The 'Henn et al.' R-Factor-gap value ..... 4.96 Note  
 Predicted wR2: Based on SigI\*\*2 2.92 or SHELX Weight 14.28  
 PLAT978\_ALERT\_2\_G Number C-C Bonds with Positive Residual Density. 0 Info

---

0 **ALERT level A** = Most likely a serious problem - resolve or explain  
 2 **ALERT level B** = A potentially serious problem, consider carefully  
 42 **ALERT level C** = Check. Ensure it is not caused by an omission or oversight  
 42 **ALERT level G** = General information/check it is not something unexpected

12 ALERT type 1 CIF construction/syntax error, inconsistent or missing data  
 37 ALERT type 2 Indicator that the structure model may be wrong or deficient  
 10 ALERT type 3 Indicator that the structure quality may be low  
 26 ALERT type 4 Improvement, methodology, query or suggestion  
 1 ALERT type 5 Informative message, check

---

It is advisable to attempt to resolve as many as possible of the alerts in all categories. Often the minor alerts point to easily fixed oversights, errors and omissions in your CIF or refinement strategy, so attention to these fine details can be worthwhile. In order to resolve some of the more serious problems it may be necessary to carry out additional measurements or structure refinements. However, the purpose of your study may justify the reported deviations and the more serious of these should normally be commented upon in the discussion or experimental section of a paper or in the "special\_details" fields of the CIF. checkCIF was carefully designed to identify outliers and unusual parameters, but every test has its limitations and alerts that are not important in a particular case may appear. Conversely, the absence of alerts does not guarantee there are no aspects of the results needing attention. It is up to the individual to critically assess their own results and, if necessary, seek expert advice.

### **Publication of your CIF in IUCr journals**

A basic structural check has been run on your CIF. These basic checks will be run on all CIFs submitted for publication in IUCr journals (*Acta Crystallographica*, *Journal of Applied Crystallography*, *Journal of Synchrotron Radiation*); however, if you intend to submit to *Acta Crystallographica Section C* or *E* or *IUCrData*, you should make sure that full publication checks are run on the final version of your CIF prior to submission.

### **Publication of your CIF in other journals**

Please refer to the *Notes for Authors* of the relevant journal for any special instructions relating to CIF submission.

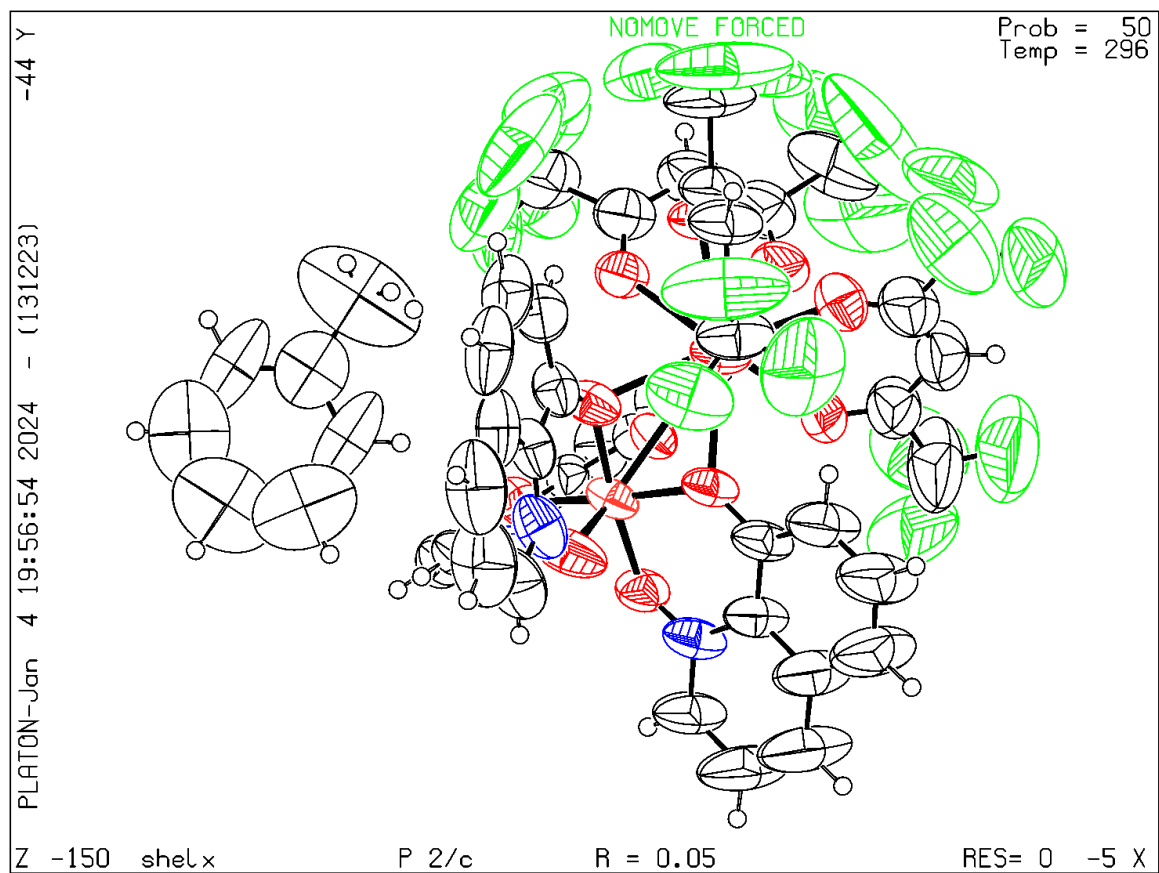

Supplement: s1 [file s1]
