# Supplementary material for: Aluminium 8-Hydroxyquinolinate N-Oxide as a Precursor to Heterometallic Aluminium–Lanthanide Complexes
Source: MDPI journal article supplement (doi:10.3390/molecules29020451), 2024-01-17
Supplement: s1 [file s1]

## Molecules

### Aluminium 8-hydroxyquinolate *N*-oxide as a precursor to heterometallic aluminium-lanthanide complexes

E. Gallo<sup>1</sup>, L. Bellucci<sup>1,2</sup>, S. Carlotto<sup>2,3</sup>, G. Bottaro<sup>2</sup>, L. Babetto<sup>3</sup>, L. Giordano<sup>1</sup>, F. Marchetti<sup>1</sup>, S. Samaritani,<sup>1</sup>  
L. Armelao<sup>3,4</sup>, L. Labella<sup>1,2\*</sup>

<sup>1</sup> *Dipartimento di Chimica e Chimica Industriale and CIRCC, Università di Pisa, via Giuseppe Moruzzi 13, I-56124 Pisa*

<sup>2</sup> *CNR ICMATE and INSTM, presso Dipartimento di Scienze Chimiche, Università di Padova, via Marzolo 1, I-35131 Padova*

<sup>3</sup> *Dipartimento di Scienze Chimiche, Università di Padova, via Marzolo 1, I-35131 Padova*

<sup>4</sup> *Dipartimento di Scienze Chimiche e Tecnologie dei Materiali (DSCTM) Consiglio Nazionale delle Ricerche  
Piazzale A. Moro 7, 00185 Roma*

\* Correspondence: [luca.labella@unipi.it](mailto:luca.labella@unipi.it) (L.L.)

## Supplementary Information

## Table of contents

### Characterization Data (List of Figures and Tables):

**Figure S1:** ATR-IR spectra (range 1700-650  $\text{cm}^{-1}$ ) of  $[\text{Eu}(\text{hfac})_3\text{Alq}_3]$  (black),  $[\text{Alq}_3]$  (red) and  $[\text{Eu}(\text{hfac})_3(\text{H}_2\text{O})_2]$  (blue)

**Figure S2:** ATR-IR spectrum of 8-hydroxyquinoline *N*-oxide (HqNO)

**Figure S3:** ATR-IR spectrum of  $[\text{Al}(\text{qNO})_3]$  (red) compared with  $[\text{HqNO}]$  (blue)

**Figure S4:**  $^1\text{H}$  NMR of 8-hydroxyquinoline *N*-oxide (HqNO) in  $\text{CDCl}_3$

**Figure S5:**  $^1\text{H}$  NMR spectrum of  $[\text{Al}(\text{qNO})_3]$  in anhydrous  $\text{CD}_2\text{Cl}_2$ .

**Figure S6:** ATR-IR spectra (1700-650  $\text{cm}^{-1}$ ) of  $[\text{Eu}(\text{hfac})_3\text{Al}(\text{qNO})_3]$  (black), of  $[\text{Al}(\text{qNO})_3]$  (red) and  $[\text{HqNO}]$  (blue)

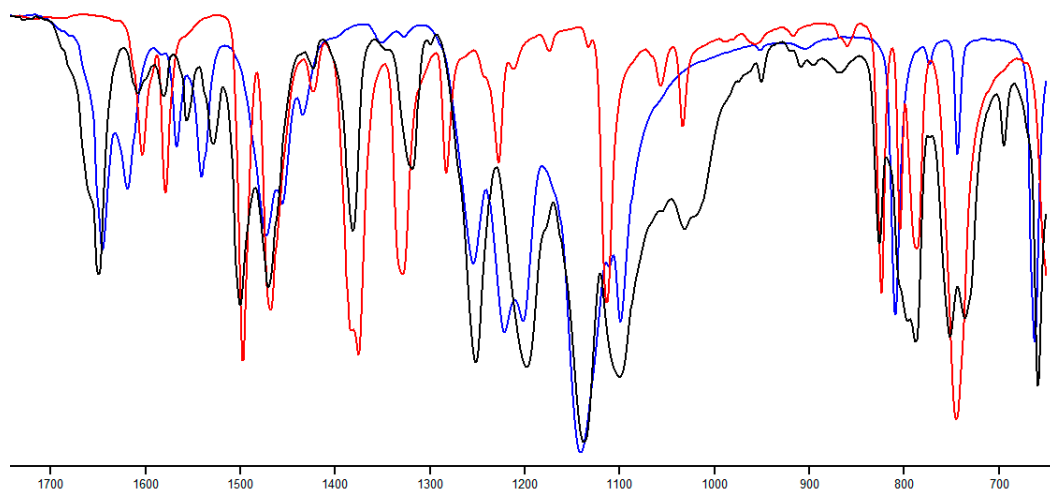

**Figure S1:** ATR-IR spectra (range 1700-650 cm<sup>-1</sup>) of [Eu(hfac)<sub>3</sub>Alq<sub>3</sub>] (black), [Alq<sub>3</sub>] (red) and [Eu(hfac)<sub>3</sub>(H<sub>2</sub>O)<sub>2</sub>] (blue).

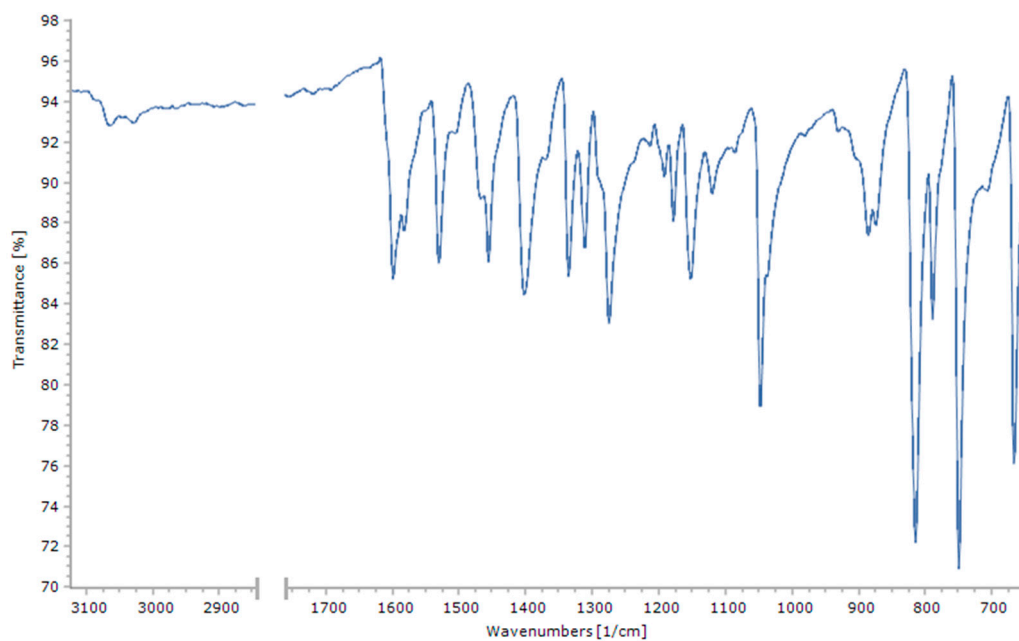

**Figure S2:** ATR-IR spectrum of 8-hydroxyquinoline *N*-oxide (HqNO).

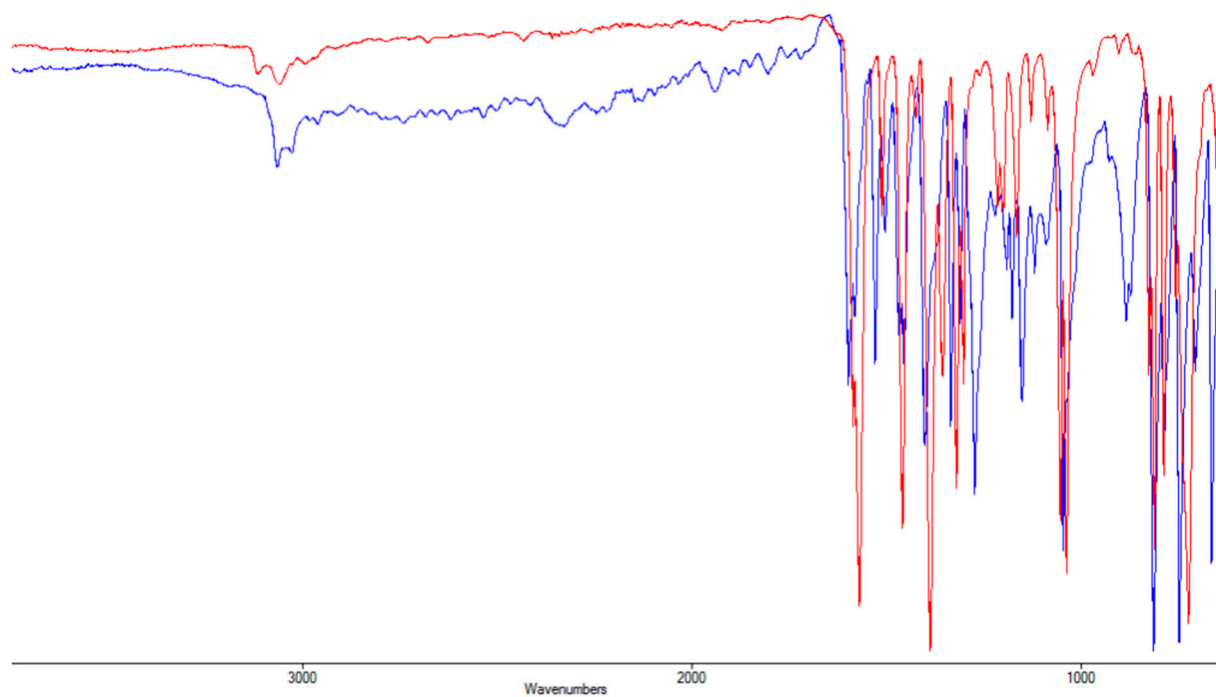

**Figure S3:** ATR-IR spectrum of [Al(qNO)<sub>3</sub>] (red) compared with [HqNO] (blue).

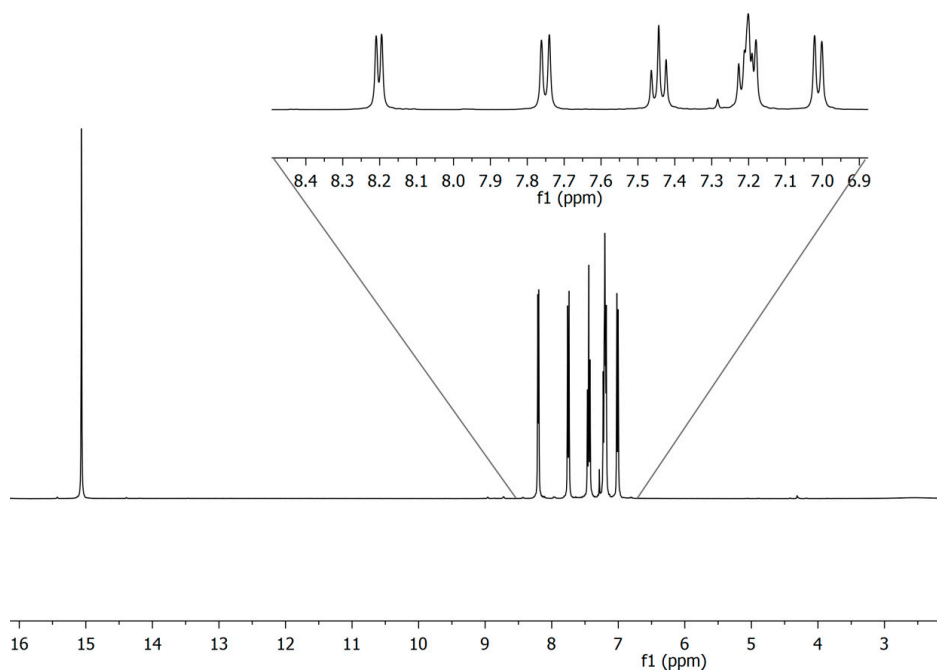

**Figure S4:** <sup>1</sup>H NMR of 8-hydroxyquinoline *N*-oxide (HqNO) in CDCl<sub>3</sub>.

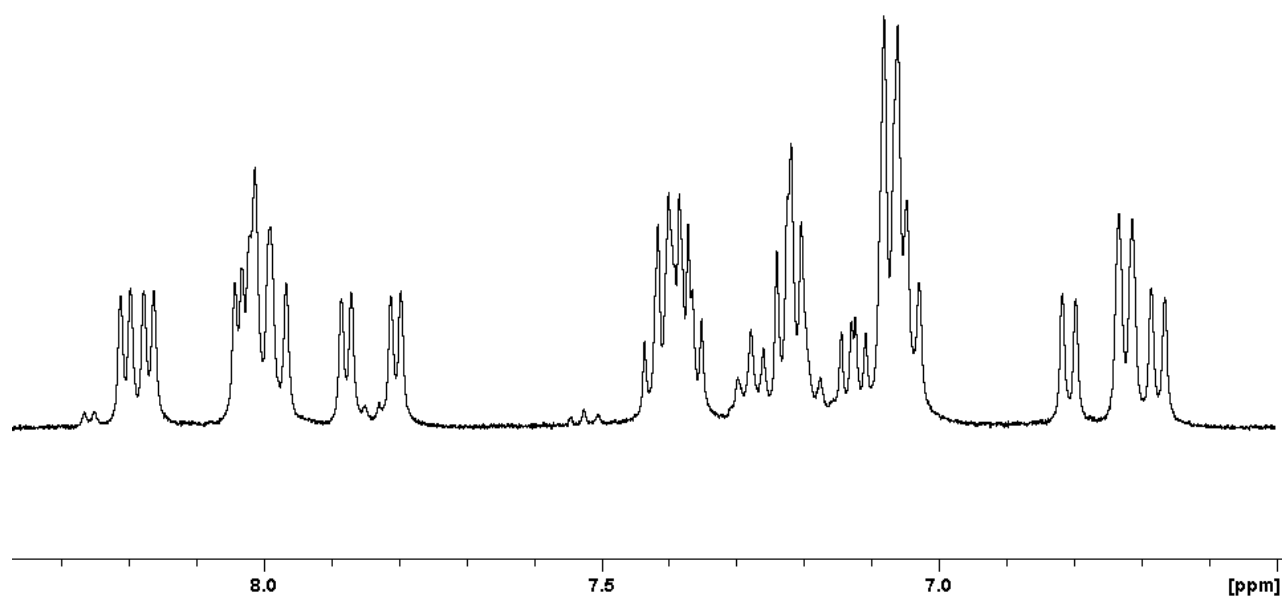

**Figure S5:**  $^1\text{H}$  NMR spectrum of  $[\text{Al}(\text{qNO})_3]$  in anhydrous  $\text{CD}_2\text{Cl}_2$ .

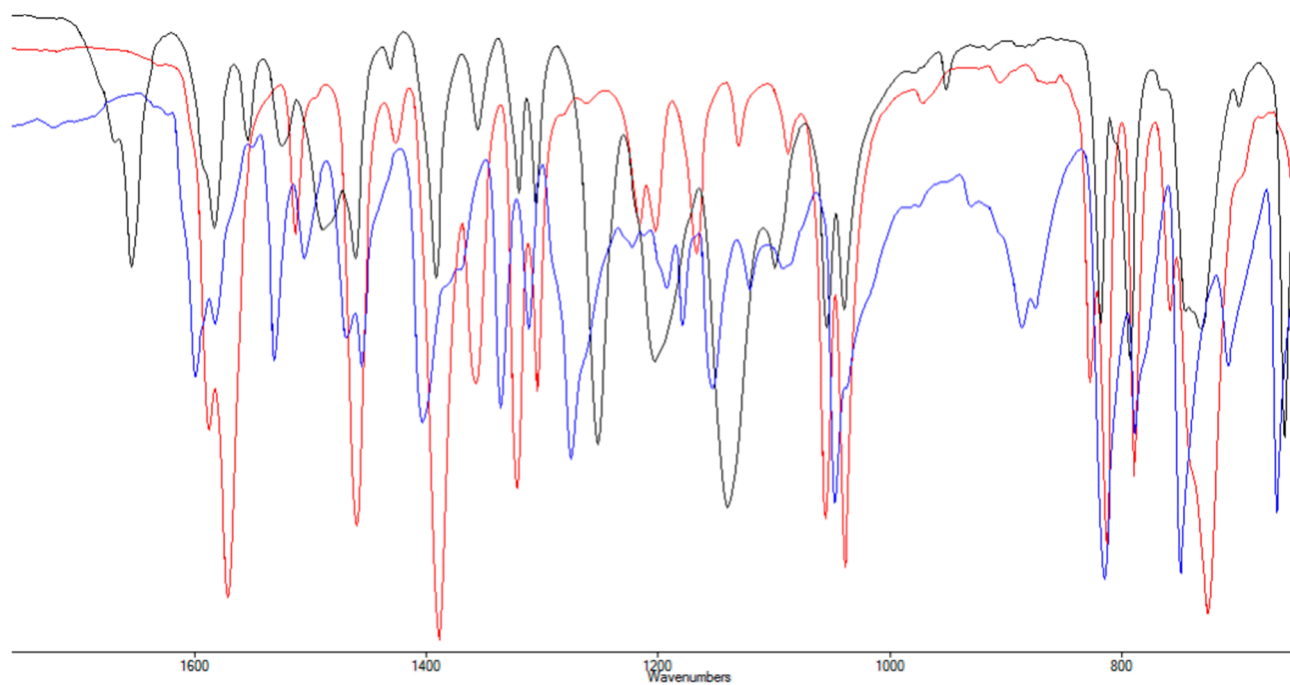

**Figure S6:** ATR-IR spectra ( $1700\text{--}650\text{ cm}^{-1}$ ) of  $[\text{Eu}(\text{hfac})_3\text{Al}(\text{qNO})_3]$  (black), of  $[\text{Al}(\text{qNO})_3]$  (red) and  $[\text{HqNO}]$  (blue).
